# Supplementary material
Source: PubMed Central journal article supplement (PMC2786548)
Supplement: supp_191_23_7206__1.pdf [file supp_191_23_7206__1.pdf]

**Table 2 A:** Peptide mass fingerprinting (MALDI-MS) of tryptic fragments Cps-L of A118

| Fragment<br>[aa] | MW<br>(exp)<br>[Da] <sup>a</sup> | MW<br>(calc)<br>[Da] <sup>b</sup> | $\Delta$<br>MW<br>[%] <sup>c</sup> | Corresponding aa-sequence <sup>d</sup> |
|------------------|----------------------------------|-----------------------------------|------------------------------------|----------------------------------------|
| 15-31            | 1769.91                          | 1770.00                           | 0.00                               | TGSIPINISEQIITGVK                      |
| 69-78            | 1150.59                          | 1150.65                           | 0.00                               | IQTSKPTFTK                             |
| 86-94            | 959.47                           | 959.56                            | 0.01                               | MGVIPTTK                               |
| 119-138          | 2356.08                          | 2356.20                           | 0.00                               | KFDQAVFTGVESPYNWNILK                   |
| 120-138          | 2228.00                          | 2228.10                           | 0.00                               | FDQAVFTGVESPYNWNILK                    |
| 139-153          | 1549.65                          | 1549.73                           | 0.01                               | SATDASNLVEETANK                        |
| 154-178          | 2744.17                          | 2744.36                           | 0.01                               | YDDLNEAIGLIEAEDLEPNGIATIR              |
| 218-241          | 2823.16                          | 2823.36                           | 0.01                               | YTFGDKDISELVGDWNQAYYGILR               |
| 224-241          | 2111.94                          | 2112.04                           | 0.00                               | DISELVGDWNQAYYGILR                     |
| 242-269          | 3033.30                          | 3033.56                           | 0.01                               | GVEYEILTEATLTTVADETGKPLNLAER           |
| 276-286          | 1227.59                          | 1227.64                           | 0.00                               | ATFEVGFMVVK                            |
| <b>287-299</b>   | <b>1347.56</b>                   | <b>1347.69</b>                    | <b>0.01</b>                        | DEAFSAVQPKAGK                          |
| <b>305-314</b>   | <b>1003.48</b>                   | <b>1003.54</b>                    | <b>0.01</b>                        | <b>SGKTDSAPIK</b>                      |
| <b>308-325</b>   | <b>1951.90</b>                   | <b>1952.00</b>                    | <b>0.01</b>                        | <b>TDSAPIKDFSVMTVAELK</b>              |
| <b>332-340</b>   | <b>993.46</b>                    | <b>993.50</b>                     | <b>0.00</b>                        | <b>NIEFASNAK</b>                       |
| <b>341-352</b>   | <b>1258.62</b>                   | <b>1258.69</b>                    | <b>0.01</b>                        | <b>KAELVALLEGSE</b>                    |

**Table 2 B:** Peptide mass fingerprinting (MALDI-MS) of tryptic fragments of Tsh-L of A118

| Fragment<br>[aa] | MW<br>(exp)<br>[Da] <sup>a</sup> | MW<br>(calc)<br>[Da] <sup>b</sup> | $\Delta$<br>MW<br>[%] <sup>c</sup> | Corresponding aa-sequence <sup>d</sup> |
|------------------|----------------------------------|-----------------------------------|------------------------------------|----------------------------------------|
| 10-25            | 1692.05                          | 1691.83                           | 0.01                               | YSVAEIVAGAGEPDWK                       |
| 30-55            | 2860.46                          | 2860.13                           | 0.01                               | WITNVSDDGSDNTEEQGDYDGDGNEK             |
| 56-73            | 2045.25                          | 2044.96                           | 0.01                               | TVVLGYSEAYTFEGTHDR                     |
| 97-108           | 1286.87                          | 1286.68                           | 0.01                               | IEIPDTETAIGK                           |
| 116-132          | 1599.91                          | 1599.69                           | 0.01                               | GSAGGGDATEFFPAFGCR                     |
| <b>133-161</b>   | <b>3128.91</b>                   | <b>3128.56</b>                    | <b>0.01</b>                        | <b>IAYDETPTVTKPEESPSSVEVGHNTITVK</b>   |
| <b>162-190</b>   | <b>2993.87</b>                   | <b>2993.51</b>                    | <b>0.01</b>                        | <b>VGETFTINASVLPVGASQEVITYTSSNPPK</b>  |
| <b>193-214</b>   | <b>2075.34</b>                   | <b>2075.06</b>                    | <b>0.01</b>                        | <b>INSVGTGEGVAEGTANITVASK</b>          |

a. Expected molecular weight determined from the observed molecular mass of the protonated ions.

b. Molecular weight of the corresponding fragment calculated from the deduced aa sequence.

c. Difference between the expected and the calculated molecular weights.

d. Amino acid residues resulting from the frameshift are indicated in bold letters

**Table S3 A:** Peptide mass fingerprinting (MALDI-MS) of tryptic fragments of Csp-L of A500

| Fragment<br>[aa] | MW<br>(exp)<br>[Da] <sup>a</sup> | MW<br>(calc)<br>[Da] <sup>b</sup> | $\Delta$<br>MW<br>[%] <sup>c</sup> | Corresponding aa-sequence <sup>d</sup> |
|------------------|----------------------------------|-----------------------------------|------------------------------------|----------------------------------------|
| 8-24             | 1799.05                          | 1798.94                           | 0.01                               | LANLIDPEVMGPMISAK                      |
| 34-53            | 2065.28                          | 2065.08                           | 0.01                               | IAPIDNSLEGQPGSEITVPK                   |
| 56-80            | 2615.48                          | 2615.24                           | 0.01                               | YIGDAQDVAEGAAIDYSALETESVK              |
| 92-110           | 2037.13                          | 2036.97                           | 0.01                               | LTDESVLSGYGDPVEEAQK                    |
| 120-136          | 1903.13                          | 1902.99                           | 0.01                               | VDNDILEEALTTTLEVK                      |
| 147-174          | 3117.75                          | 3117.52                           | 0.01                               | IENFTDAPDAIEDESITTTGVLFLNYK            |
| 179-189          | 1247.71                          | 1247.64                           | 0.01                               | LREEAAGSWTK                            |
| 190-200          | 1158.70                          | 1158.64                           | 0.01                               | ASQLGDDLLVK                            |
| 201-213          | 1446.86                          | 1446.77                           | 0.01                               | GAFGELLGWEIVR                          |
| 217-226          | 971.61                           | 971.55                            | 0.01                               | LADGNALAVK                             |
| 237-244          | 859.52                           | 859.46                            | 0.01                               | NLLAESGR                               |
| <b>284-304</b>   | <b>2269.09</b>                   | <b>2269.25</b>                    | <b>0.01</b>                        | <b>SVETDSAPIQDFSTMTVAELKEELVTR</b>     |

**Table S3 B:** Peptide mass fingerprinting (MALDI-MS) of tryptic fragments of Tsh-L of A500

| Fragment<br>[aa] | MW<br>(exp)<br>[Da] <sup>a</sup> | MW<br>(calc)<br>[Da] <sup>b</sup> | $\Delta$<br>MW<br>[%] <sup>c</sup> | Corresponding aa-sequence <sup>d</sup> |
|------------------|----------------------------------|-----------------------------------|------------------------------------|----------------------------------------|
| 11-26            | 1807.89                          | 1807.93                           | 0.00                               | YFVAEIVDGVGEPVWK                       |
| 31-56            | 2859.99                          | 2860.13                           | 0.00                               | WITNVSDDGSDNTEEQGDYDGDGNEK             |
| 57-85            | 3255.33                          | 3255.58                           | 0.01                               | TVVLGYSEAYTFEGTHDREDEAQNLIK            |
| 98-109           | 1272.62                          | 1272.67                           | 0.00                               | IEIPDTETAVGK                           |
| 117-133          | 1613.74                          | 1613.70                           | 0.00                               | GSAGGGDATEFPFAFACR                     |
| 134-141          | 936.43                           | 936.47                            | 0.00                               | IAYDETPK                               |
| <b>142-162</b>   | <b>2269.13</b>                   | <b>2269.16</b>                    | <b>0.00</b>                        | <b>VTKPEESPSSVTDHDTITVK</b>            |
| <b>163-191</b>   | <b>2965.32</b>                   | <b>2965.48</b>                    | <b>0.01</b>                        | <b>VGETFTINASVLPAGASQEVITYTSSNPPK</b>  |

a. Expected molecular weight determined from the observed molecular mass of the protonated ions.

b. Molecular weight of the corresponding fragment calculated from the deduced aa sequence.

c. Difference between the expected and the calculated molecular weights.

d. Amino acid residues resulting from the frameshift are indicated in bold letters

**TABLE 4.** General features and database matches of predicted proteins encoded by *Listeria monocytogenes* bacteriophage A006. Gene products annotated on the complementary strand are marked with an asterisk\*. gp Gene product, pI isoelectric point, MW molecular weight.

| ORF   | Start | Stop  | GP (pI) | MW (kDa) | Protein similarities in the database                                                                                                                    |
|-------|-------|-------|---------|----------|---------------------------------------------------------------------------------------------------------------------------------------------------------|
| gp1   | 28    | 768   | 9.3     | 27.7     | <i>Listeria innocua</i> lin2395 terminase small subunit, <i>L. monocytogenes</i> F6854, H7858                                                           |
| gp2   | 761   | 2080  | 5.7     | 50.7     | <i>L. innocua</i> lin2394 terminase large subunit, <i>L. monocytogenes</i> H7858, F6854                                                                 |
| gp3   | 2095  | 3651  | 5.5     | 58.7     | <i>L. monocytogenes</i> F6854, <i>L. innocua</i> lin2393, <i>L. monocytogenes</i> H7858                                                                 |
| gp4   | 3656  | 4696  | 6.2     | 40.7     | <i>L. innocua</i> lin2392 + <i>L. monocytogenes</i> H7858, F6854, Bacteriophage A118 gp4 putative minor capsid                                          |
| gp5   | 4792  | 5346  | 4.6     | 21.0     | <i>L. monocytogenes</i> F6854, H7858, <i>L. innocua</i> lin2391                                                                                         |
| gp6   | 5369  | 6241  | 5.4     | 32.2     | <i>L. innocua</i> lin2390 major capsid, <i>L. monocytogenes</i> H7858, F6854                                                                            |
| gp7   | 6255  | 6392  | 4.2     | 5.4      | <i>L. monocytogenes</i> H7858 + F6854, <i>L. innocua</i> lin2389                                                                                        |
| gp8   | 6424  | 6777  | 4.2     | 12.7     | <i>L. monocytogenes</i> F6854, <i>L. innocua</i> lin2388, H7858                                                                                         |
| gp9   | 6777  | 7142  | 4.4     | 13.6     | <i>L. monocytogenes</i> H7858, <i>L. innocua</i> lin2387                                                                                                |
| gp10  | 7132  | 7449  | 10.0    | 12.0     | <i>L. monocytogenes</i> F6854 LMOF6854_2667                                                                                                             |
| gp11  | 7446  | 7817  | 5.7     | 14.1     | <i>L. monocytogenes</i> H7858, F6854, <i>L. innocua</i> lin2386                                                                                         |
| gp12  | 7822  | 8508  | 4.4     | 23.5     | <i>L. innocua</i> lin2385, <i>L. monocytogenes</i> H7858, F6854, Bacteriophage A118 gp13 major tail protein (Tsh)                                       |
| gp13  | 8564  | 8995  | 4.3     | 16.1     | <i>L. monocytogenes</i> H7858, <i>L. innocua</i> lin2384, F6854                                                                                         |
| gp14  | 9028  | 9303  | 10.1    | 10.7     | <i>L. monocytogenes</i> F6854 LMOF6854_2662, <i>L. monocytogenes</i> H7858 LMOh7858_2424                                                                |
| gp15  | 9308  | 14107 | 9.7     | 174.1    | <i>L. monocytogenes</i> H7858, M23/37, Bacteriophage L54a, <i>L. innocua</i> lin2383, <i>L. monocytogenes</i> F6854 putative Tape measure protein (Tmp) |
| gp16  | 14104 | 15672 | 5.2     | 58.5     | <i>L. monocytogenes</i> F6854, <i>B. cereus</i> phage putative tail component                                                                           |
| gp17  | 15685 | 17847 | 4.6     | 78.8     | <i>L. monocytogenes</i> F6854 phage minor structural protein                                                                                            |
| gp18  | 17898 | 18203 | 9.2     | 11.5     | <i>L. innocua</i> lin2376, <i>L. monocytogenes</i> F6854                                                                                                |
| gp19  | 18203 | 18484 | 10.2    | 10.5     | <i>L. monocytogenes</i> F6854 holin, <i>L. innocua</i> lin2375, lin1295                                                                                 |
| gp20  | 18484 | 19191 | 10.1    | 25.7     | <i>L. monocytogenes</i> F6854 phage lysin cply2438, <i>L. innocua</i> , A500 L-Alanoyl-D-glutamate-peptidase                                            |
| gp21* | 20020 | 19232 | 8.7     | 31       | <i>L. monocytogenes</i> F6854 LMOF6854_2339                                                                                                             |
| gp22* | 20777 | 20280 | 10.2    | 19.3     | <i>L. monocytogenes</i> EGDe lmo2276, F6854                                                                                                             |
| gp23* | 21251 | 20802 | 5.4     | 17.3     | <i>L. monocytogenes</i> F6854 gp28, <i>L. monocytogenes</i> EGDe, <i>L. innocua</i> , Bacteriophage A118 gp28                                           |
| gp24* | 21503 | 21252 | 4.3     | 9.9      |                                                                                                                                                         |
| gp25* | 21768 | 21535 | 4.1     | 9.3      | <i>L. monocytogenes</i> F6854 LMOF6854_2335                                                                                                             |
| gp26  | 22067 | 22300 | 5.0     | 9.4      | <i>L. innocua</i> lin2372, Bacteriophage PSA Gp22, <i>L. monocytogenes</i> EGDe lmo2271, <i>L. monocytogenes</i> H7858                                  |
| gp27  | 22297 | 22500 | 6.6     | 7.9      | <i>L. innocua</i> lin1302, Bacteriophage PSA Gp23, <i>L. monocytogenes</i> H7858                                                                        |
| gp28* | 23910 | 22780 | 9.4     | 43.6     | <i>Genobacillus</i> sp. G11MC15 integrase, <i>Bacillus halodurans</i> integrase, Bacteriophage phig1e, <i>Enterococcus faecium</i>                      |
| gp29* | 24483 | 23974 | 4.9     | 19.1     |                                                                                                                                                         |
| gp30* | 25001 | 24510 | 5.3     | 19.3     | <i>L. monocytogenes</i> H7858 gp35, Bacteriophage A118 gp35, <i>L. innocua</i> lin0160, <i>L. monocytogenes</i> EGDe lmo0113, F2365                     |
| gp31* | 25341 | 25033 | 4.6     | 12.1     | <i>L. monocytogenes</i> H7858 transcriptional regulator, <i>L. innocua</i> lin2422, Bacteriophage A118 putative repressor protein                       |
| gp32  | 25490 | 25741 | 9.8     | 9.5      | <i>L. innocua</i> lin2421, <i>L. monocytogenes</i> H7858 putative transcriptional regulator                                                             |
| gp33  | 25745 | 25981 | 4.4     | 8.8      | <i>L. innocua</i> gp40, lin2420                                                                                                                         |
| gp34  | 25978 | 26331 | 4.7     | 13.2     | <i>L. monocytogenes</i> EGDe lmo2326, <i>L. innocua</i> lin0078, <i>L. monocytogenes</i> H7858, F6854, Bacteriophage A118 gp41                          |
| gp35* | 26851 | 26309 | 4.4     | 21.3     |                                                                                                                                                         |

|      |       |       |      |      |                                                                                                                                                           |
|------|-------|-------|------|------|-----------------------------------------------------------------------------------------------------------------------------------------------------------|
| gp36 | 26915 | 27688 | 10.0 | 29.3 | <i>L. innocua</i> lin0080 anti-repressor homolog A118, lin2418, <i>Streptococcus pyogenes</i> , orf010 Bacteriophage 77                                   |
| gp37 | 27810 | 28334 | 5.3  | 19.3 | <i>L. innocua</i> lin0081, <i>L. monocytogenes</i> F6854, EGDe, H7858, Bacteriophage A118 gp43                                                            |
| gp38 | 28341 | 28577 | 6.8  | 9.3  | <i>Bacillus halodurans</i>                                                                                                                                |
| gp39 | 28685 | 28873 | 5.7  | 7.2  | <i>L. innocua</i> lin0083, Bacteriophage A118 gp45, <i>L. monocytogenes</i> H7858, <i>L. innocua</i> lin2415, <i>L. monocytogenes</i> EGDe lmo2321, F6854 |
| gp40 | 28873 | 28962 | 9.5  | 3.4  | Bacteriophage A118 gp46                                                                                                                                   |
| gp41 | 29109 | 30068 | 6.3  | 36.7 | <i>L. innocua</i> gp47, lin0084, <i>L. monocytogenes</i> H7858, F6854, Bacteriophage A118 gp47                                                            |
| gp42 | 30068 | 30883 | 5.1  | 30.7 | <i>L. innocua</i> putative recombinase lin2413, <i>L. monocytogenes</i> F6854, Bacteriophage A118, lin0085, H7858                                         |
| gp43 | 30903 | 31835 | 9.3  | 36.8 | Bacteriophage A118 gp49, <i>L. innocua</i> lin2412, <i>L. monocytogenes</i> F6854 DnaD domain protein, EGDe lmo2317, F6854, lin0086                       |
| gp44 | 31832 | 32296 | 9.2  | 18.1 | Bacteriophage A118 putative methyltransferase, <i>Enterococcus faecalis</i> V583, Bacteriophage phig1e                                                    |
| gp45 | 32293 | 32853 | 4.4  | 21.3 | Bacteriophage A118 gp51, <i>L. innocua</i> lin0089, <i>L. monocytogenes</i> EGDe lmo2315, F6854, H7858, Bacteriophage PSA Gp35                            |
| gp46 | 32850 | 32996 | 4.2  | 5.5  | Bacteriophage A118 gp52, <i>L. innocua</i>                                                                                                                |
| gp47 | 33074 | 33475 | 4.5  | 15.7 | Bacteriophage A118 gp54                                                                                                                                   |
| gp48 | 33472 | 33681 | 4.0  | 8.1  | Bacteriophage A118 gp55, <i>L. innocua</i> lin0094, <i>L. monocytogenes</i> F6854                                                                         |
| gp49 | 33678 | 34076 | 9.5  | 15.1 | Bacteriophage A118 gp56                                                                                                                                   |
| gp50 | 34082 | 34192 | 4.6  | 4    | Bacteriophage A118 gp57                                                                                                                                   |
| gp51 | 34192 | 34284 | 7.3  | 3.3  | Bacteriophage A118 gp58                                                                                                                                   |
| gp52 | 34520 | 34921 | 5.7  | 15.2 | Bacteriophage A118 gp59, <i>L. monocytogenes</i> H7858, F6854, <i>L. innocua</i> lin0095                                                                  |
| gp53 | 34918 | 35400 | 5.1  | 17.8 | Bacteriophage A118 putative SSB protein, <i>L. monocytogenes</i> EGDe lmo2398, H7858, F6854, <i>L. innocua</i> lin0079, lin2402                           |
| gp54 | 35432 | 35737 | 10.6 | 11.7 | Bacteriophage A118 gp61, <i>L. monocytogenes</i> H7858 putative response regulator, <i>L. innocua</i> lmaD, EGDe lmo0115                                  |
| gp55 | 35734 | 35874 | 5.0  | 5.6  | Bacteriophage A118 gp62                                                                                                                                   |
| gp56 | 35840 | 36244 | 8.4  | 15.5 | Bacteriophage A118 gp63, <i>L. monocytogenes</i> H7858, <i>Lactobacillus plantarum</i> prophage LP2 protein 24                                            |
| gp57 | 36237 | 36362 | 10.6 | 4.6  | Bacteriophage A118 gp64                                                                                                                                   |
| gp58 | 36373 | 36537 | 4.2  | 6.3  | Bacteriophage A118 gp65, <i>L. monocytogenes</i> EGDe                                                                                                     |
| gp59 | 36556 | 36990 | 9.0  | 17.1 | Bacteriophage A118 gp66, <i>L. innocua</i> , <i>L. monocytogenes</i> EGDe, F6854 transcriptional regulator, <i>L. innocua</i> lin1739 + lin1259           |
| gp60 | 37036 | 37185 | 6.1  | 5.6  | Bacteriophage A118 gp67 (100% of n-terminal 25aa)                                                                                                         |
| gp61 | 37172 | 37804 | 4.7  | 25   |                                                                                                                                                           |
| gp62 | 37885 | 38112 | 5.7  | 8.4  | <i>L. innocua</i> lin2396, <i>L. monocytogenes</i> H7858 + F6854                                                                                          |

**TABLE 5.** General features and database matches of the predicted proteins encoded by *Listeria monocytogenes* bacteriophage A500. Gene products annotated on the complementary strand are marked with an asterisk\*. gp Gene product, pI isoelectric point, MW molecular weight.

| ORF  | Start | Stop  | GP (pI) | MW (kDa) | Protein similarities in the database                                                                                                                                                                               |
|------|-------|-------|---------|----------|--------------------------------------------------------------------------------------------------------------------------------------------------------------------------------------------------------------------|
| gp1  | 23    | 65    | 5.1     | 20.0     | <i>Listeria innocua</i> lin0104 terminase small subunit, Bacteriophage A118                                                                                                                                        |
| gp2  | 534   | 1865  | 5.7     | 51.4     | <i>L. innocua</i> lin0105 terminase large subunit, <i>L. monocytogenes</i> EGDe lmo2300, Bacteriophage A118, <i>L. monocytogenes</i> F6854, phage IEBH                                                             |
| gp3  | 1878  | 3377  | 4.7     | 56.8     | Bacteriophage A118 putative portal protein, <i>L. innocua</i> lin0106, <i>L. monocytogenes</i> F6854, EGDe lmo2299                                                                                                 |
| gp4  | 3383  | 4522  | 9.6     | 43.1     | Bacteriophage A118 gp4, <i>L. innocua</i> lin0107, <i>L. monocytogenes</i> F6854, EGDe, Bacteriophage A118 minor capsid protein                                                                                    |
| gp5  | 4601  | 5200  | 4.5     | 21.8     | <i>L. monocytogenes</i> F6854 putative scaffolding protein, Bacteriophage A118, <i>L. innocua</i> lin0108, <i>L. monocytogenes</i> EGDe lmo2297, phage BCJA1c                                                      |
| gp6  | 5223  | 6059  | 4.9     | 29.7     | <i>L. monocytogenes</i> F6854, <i>Lactococcus lactis</i> phage TP901-1; <i>Streptococcus pyogenes</i> phage 315.4 putative major head protein                                                                      |
| gp6* | 5223  | 6213  |         |          | Cps-L                                                                                                                                                                                                              |
| gp7  | 6059  | 6217  | 4.2     | 5.6      | <i>L. innocua</i> lin0110, <i>L. monocytogenes</i> F6854, Bacteriophage A118 gp7                                                                                                                                   |
| gp8  | 6219  | 6614  | 5.5     | 14.6     | <i>L. innocua</i> lin0111, Bacteriophage A118 gp8, <i>L. monocytogenes</i> F6854, EGDe                                                                                                                             |
| gp9  | 6614  | 6976  | 5.6     | 13.8     | <i>L. innocua</i> lin0112, <i>L. monocytogenes</i> F6854, Bacteriophage A118 gp9, <i>L. monocytogenes</i> EGDe                                                                                                     |
| gp10 | 6976  | 7314  | 9.8     | 12.7     | <i>L. innocua</i> lin0113, <i>L. monocytogenes</i> EGDe, Bacteriophage A118 putative minor capsid, <i>L. monocytogenes</i> F6854                                                                                   |
| gp11 | 7314  | 7721  | 4.2     | 15.1     | <i>L. innocua</i> lin0114, <i>L. monocytogenes</i> EGDe, F6854, Bacteriophage A118 gp11                                                                                                                            |
| gp12 | 7724  | 8161  | 4.6     | 15.9     | <i>L. innocua</i> lin0115, <i>L. monocytogenes</i> F6854, EGDe, Bacteriophage A118 major tail protein (Tsh)                                                                                                        |
| gp13 | 8184  | 8423  | 4.5     | 8.0      | <i>L. monocytogenes</i> EGDe gp13, Bacteriophage A118 gp13, <i>L. monocytogenes</i> F6854                                                                                                                          |
| gp14 | 8476  | 8898  | 4.9     | 16.6     | <i>L. innocua</i> lin0117, <i>L. monocytogenes</i> F6854, EGDe, Bacteriophage A118 gp14                                                                                                                            |
| gp15 | 8904  | 9506  | 4.2     | 23.2     | <i>L. innocua</i> lin0118 <i>L. monocytogenes</i> F6854, EGDe, phage phiNIH1.1_40, Bacteriophage A118 gp15 putative tail protein                                                                                   |
| gp16 | 9517  | 14883 | 10.1    | 185.6    | <i>L. innocua</i> lin0019, <i>L. monocytogenes</i> EGDe lmo2287, F6854, Bacteriophage A118 gp16 putative tape measure protein (Tmp)                                                                                |
| gp17 | 14880 | 15707 | 6.8     | 31.7     | <i>L. innocua</i> lin0120 gp17, <i>L. monocytogenes</i> EGDe, F6854, Bacteriophage A118 putative tail or base plate                                                                                                |
| gp18 | 15722 | 16744 | 5.2     | 40.0     | <i>L. innocua</i> lin0121, Bacteriophage A118 gp18 putative tail or base plate, <i>L. monocytogenes</i> F6854, EGDe, F2365                                                                                         |
| gp19 | 16745 | 17770 | 4.7     | 37.3     | <i>L. innocua</i> lin0122, lin2380, <i>L. monocytogenes</i> H7858, EGDe, F6854, Bacteriophage A118 gp19 putative tail or base plate                                                                                |
| gp20 | 16767 | 18834 | 4.8     | 38.9     | <i>L. innocua</i> lin0123, <i>L. monocytogenes</i> H7858, <i>L. innocua</i> lin2379, lin2565 Bacteriophage PSA Gp15, Bacteriophage A118 gp20 putative tail fiber                                                   |
| gp21 | 18831 | 19172 | 4.0     | 12.5     | <i>L. innocua</i> lin0124, lin2378, lin2564; <i>L. monocytogenes</i> H7858 gp16, Bacteriophage PSA Gp16                                                                                                            |
| gp22 | 19173 | 19319 | 9.1     | 5.6      | <i>L. innocua</i> lin0125, Bacteriophage PSA Gp17, <i>L. innocua</i> lin2377                                                                                                                                       |
| gp23 | 19356 | 19721 | 7.7     | 14.4     | <i>L. monocytogenes</i> H7858 + <i>L. innocua</i> gp23, Bacteriophage A118 gp23, <i>L. monocytogenes</i> F6854 + EGDe                                                                                              |
| gp24 | 19725 | 20015 | 9.8     | 10.2     | <i>L. innocua</i> holin, <i>L. monocytogenes</i> H7858, Bacteriophage A118 gp24, <i>L. monocytogenes</i> F6854, EGDe                                                                                               |
| gp25 | 20015 | 20884 | 9.8     | 33.4     | <i>L. monocytogenes</i> H7858 L-Alanoyl-D-glutamate-peptidase, <i>L. innocua</i> , <i>L. monocytogenes</i> F6854 cply2438, <i>L. innocua</i> lin2563, lin2374, lin1700, Bacteriophage PSA, Bacteriophage A118 gp25 |

|       |       |       |      |      |                                                                                                                                                               |
|-------|-------|-------|------|------|---------------------------------------------------------------------------------------------------------------------------------------------------------------|
| gp26  | 21378 | 21929 | 9.8  | 21.1 | <i>L. monocytogenes</i> EGDe lmo2277                                                                                                                          |
| gp27  | 22516 | 23148 | 9.7  | 22.9 | <i>L. monocytogenes</i> EGDe lmo0638                                                                                                                          |
| gp28  | 23171 | 23353 | 10.3 | 7.3  |                                                                                                                                                               |
| gp29  | 23596 | 23829 | 5.4  | 9.4  | <i>L. innocua</i> lin2372, Bacteriophage PSA Gp22, <i>L. monocytogenes</i> EGDe lmo2271, H7858                                                                |
| gp30  | 23826 | 24032 | 9.7  | 8.1  | Bacteriophage PSA Gp23, <i>L. monocytogenes</i> H7858, <i>L. innocua</i> lin1302                                                                              |
| gp31* | 25483 | 24281 | 9.9  | 46.2 | <i>L. innocua</i> lin0071 integrase, <i>L. monocytogenes</i> F6854 putative site specific recombinase                                                         |
| gp32* | 26289 | 25549 | 4.4  | 27   | Bacteriophage A118 gp32, <i>C. perfringens</i> SM101 CPR_0150                                                                                                 |
| gp33* | 26852 | 26424 | 4.6  | 16.2 | <i>L. monocytogenes</i> EGDe lmo2329 putative repressor protein, F6854 transcriptional regulator; <i>L. innocua</i> lin0073, lin2422, Bacteriophage A118 gp33 |
| gp34  | 27015 | 27236 | 8.7  | 8.2  | <i>Moorella theramoacetica</i> predicted transcriptional regulator, <i>Lactobacillus</i> phage phig1e repressor protein                                       |
| gp35  | 27250 | 27477 | 9.6  | 8.4  | <i>L. innocua</i> lin2420, Bacteriophage A118 gp40                                                                                                            |
| gp36  | 27489 | 27773 | 4.2  | 10.9 | <i>L. innocua</i> lin2411, lin2603                                                                                                                            |
| gp37  | 27786 | 28565 | 8.7  | 30   | <i>L. monocytogenes</i> EGDe lmo2324 + F6854 anti-repressor, Bacteriophage A118 gp42; <i>L. monocytogenes</i> H7858                                           |
| gp38  | 28689 | 29213 | 5.9  | 19.4 | <i>L. innocua</i> lin0081, <i>L. monocytogenes</i> F6854, EGDe, H7858 gp43; Bacteriophage A118 gp43                                                           |
| gp39  | 29220 | 29405 | 10   | 6.9  | <i>L. innocua</i> lin0082, <i>Verminephrobacter eiseniae</i> EF01-2 phage transcription regulator                                                             |
| gp40  | 29422 | 29511 | 9.5  | 3.3  | Bacteriophage A118 gp46                                                                                                                                       |
| gp41  | 29504 | 29632 | 3.7  | 5.1  |                                                                                                                                                               |
| gp42  | 29727 | 29921 | 5.4  | 7.6  | <i>L. monocytogenes</i> EGDe lmo2320                                                                                                                          |
| gp43  | 29918 | 30394 | 5.2  | 18.2 | <i>L. monocytogenes</i> EGDe lmo2319, H7858, F6854; lmo2180 EGDe; <i>L. innocua</i> lin2284, Bacteriophage PSA Gp46                                           |
| gp44  | 30400 | 31059 | 7.6  | 23.8 | <i>L. monocytogenes</i> EGDe lmo2318; Bacteriophage ORF020, <i>Staphylococcus aureus</i> prophage phiPV83 orf 17 and phage EW ORF021                          |
| gp45  | 31076 | 32053 | 5.7  | 37.7 | <i>L. monocytogenes</i> EGDe lmo2317, F6854 putative DnaD domain protein; Bacteriophage A118 gp49; <i>L. innocua</i> lin2412                                  |
| gp46  | 32050 | 32217 | 9.5  | 6.4  | <i>L. innocua</i> lin0087, <i>Streptococcus thermophilus</i> phage Sfi11 gp57                                                                                 |
| gp47  | 32223 | 32516 | 10.4 | 11.6 | <i>L. monocytogenes</i> F6854 LMOF6854_2692, Bacteriophage PSA Gp33                                                                                           |
| gp48  | 32513 | 32722 | 9.9  | 8.1  | <i>L. monocytogenes</i> F6854 LMOF6854_2691                                                                                                                   |
| gp49  | 32719 | 33327 | 4.7  | 23.3 | <i>L. monocytogenes</i> H7858, F6854, EGDe lmo2315, Bacteriophage A118 gp51                                                                                   |
| gp50  | 33324 | 33692 | 5.9  | 14.2 |                                                                                                                                                               |
| gp51  | 33689 | 33865 | 4.4  | 6.6  |                                                                                                                                                               |
| gp52  | 33852 | 34313 | 4.9  | 17.3 | <i>L. monocytogenes</i> EGDe lmo2313, F6854; <i>L. innocua</i> lin0090; Bacteriophage PSA Gp37                                                                |
| gp53  | 34310 | 34831 | 4.3  | 20.3 |                                                                                                                                                               |
| gp54  | 34828 | 35268 | 4.7  | 17.2 | <i>L. monocytogenes</i> EGDe lmo2312, F6854                                                                                                                   |
| gp55  | 35265 | 35465 | 5.4  | 7.5  |                                                                                                                                                               |
| gp56  | 35465 | 35947 | 4.9  | 17.7 | Bacteriophage A118 gp60 putative SSB protein; <i>L. monocytogenes</i> EGDe lmo2308, F6854; <i>L. innocua</i> lin0097, lin2402; <i>L. monocytogenes</i> H7858  |
| gp57  | 35968 | 36159 | 4.2  | 7.1  | <i>L. monocytogenes</i> F6854, <i>L. innocua</i> lin0098; <i>L. monocytogenes</i> EGDe lmo2307; <i>L. innocua</i> lin2401                                     |
| gp58  | 36104 | 36508 | 10.2 | 15.9 | <i>L. innocua</i> lin0099; <i>L. monocytogenes</i> F6854, EGDe lmo2306, <i>L. innocua</i> lin2400                                                             |
| gp59  | 36512 | 36895 | 9.6  | 15.5 | <i>L. monocytogenes</i> EGDe lmo2305, <i>L. innocua</i> lin0100; <i>L. monocytogenes</i> F6854, <i>L. innocua</i> lin2399                                     |
| gp60  | 36888 | 37013 | 10   | 4.6  | Bacteriophage A118 gp64                                                                                                                                       |
| gp61  | 37025 | 37189 | 4.3  | 6.3  | <i>L. monocytogenes</i> EGDe lmo2304, Bacteriophage A118 gp65                                                                                                 |
| gp62  | 37208 | 37642 | 9.3  | 16.9 | <i>L. monocytogenes</i> EGDe lmo2303, F6854 transcriptional regulator, <i>L. innocua</i> , Bacteriophage A118 gp66                                            |
| gp63  | 38006 | 38566 | 5.2  | 21.5 | <i>Enterococcus faecalis</i> V583 EF0126                                                                                                                      |

|      |       |       |     |     |                                    |
|------|-------|-------|-----|-----|------------------------------------|
| gp64 | 38663 | 38848 | 5.1 | 6.8 | <i>L. innocua</i> lin1734, lin1265 |
|------|-------|-------|-----|-----|------------------------------------|

**TABLE 6.** General features and database matches of the of predicted proteins encoded by *Listeria innocua* bacteriophage B025. Gene products annotated on the complementary strand are marked with an asterisk\*. gp Gene product, pI isoelectric point, MW molecular weight.

| ORF  | Start | Stop  | GP (pI) | MW (kDa) | Protein similarities in the database                                                                                                                    |
|------|-------|-------|---------|----------|---------------------------------------------------------------------------------------------------------------------------------------------------------|
| gp1  | 62    | 361   | 5.4     | 11.5     | <i>Streptococcus pyogenes</i> SSI-1, Bacteriophage 2638A                                                                                                |
| gp2  | 358   | 2001  | 5.2     | 63.4     | <i>Staphylococcus aureus</i> terminase large subunit, phage phiNM3, phage 77, Bacteriophage PSA                                                         |
| gp3  | 2013  | 3143  | 4.8     | 43.6     | Bacteriophage 77 ORF008, <i>S. aureus</i> JH1 and SAR2063, Bacteriophage PSA putative portal protein                                                    |
| gp4  | 3140  | 3889  | 4.9     | 27.5     | <i>Clostridium tetani</i> E88 putative scaffold protein, Bacteriophage 77, <i>S. pyogenes</i> SSI-1, <i>S. agalactiae</i> ClpP protease                 |
| gp5  | 3916  | 5067  | 4.9     | 42.4     | Bacteriophage 77 Orf006, <i>S. aureus</i> SAR2061, JH9 and JH1, Bacteriophage PSA Gp5major capsid                                                       |
| gp6  | 5074  | 5244  | 10.1    | 6.6      |                                                                                                                                                         |
| gp7  | 5254  | 5553  | 4.4     | 11.5     | Bacteriophage 77 ORF042; Bacteriophage 2638A ORF036; Bacteriophage PSA Gp6                                                                              |
| gp8  | 5537  | 5902  | 6.2     | 13.9     | Bacteriophage 77 ORF033; Bacteriophage 2638A ORF027                                                                                                     |
| gp9  | 5899  | 6300  | 10.0    | 14.8     | Bacteriophage 3A ORF028, Bacteriophage 47 ORF028, other <i>S. aureus</i> bacteriophages                                                                 |
| gp10 | 6297  | 6680  | 4.8     | 14.7     | Bacteriophage 3A ORF029, Bacteriophage 47 ORF029, Bacteriophage 3A ORF029                                                                               |
| gp11 | 6702  | 7289  | 4.6     | 21.1     | Bacteriophage 3A ORF017, <i>S. aureus</i> phi14 family major tail protein. <i>S. aureus</i> phage phiSLT major tail protein (Tsh)                       |
| gp12 | 7324  | 7692  | 4.8     | 14.6     | Bacteriophage 47 ORF033, Bacteriophage 42e ORF041, <i>S. aureus</i> protein MW1391                                                                      |
| gp13 | 7743  | 7892  | 4.8     | 5.9      |                                                                                                                                                         |
| gp14 | 7908  | 12803 | 10.0    | 174.5    | <i>Listeria innocua</i> lin1716, <i>Leuconostoc mesenteroides</i> COG5283, <i>Lactococcus lactis</i> prophage pi3 tail protein, Bacteriophage B054 gp18 |
| gp15 | 12830 | 13660 | 6.5     | 31.7     | Bacteriophage 47 ORF015, Bacteriophage 42e ORF014, <i>L. monocytogenes</i> EGDe gp17, F6854, <i>L. innocua</i> lin0169                                  |
| gp16 | 13670 | 15262 | 6.4     | 60.1     | Bacteriophage 47 ORF006, <i>S. aureus</i> SAS0946, Bacteriophage 42e + 3A ORF004, <i>L. monocytogenes</i> EGDe lmo0123                                  |
| gp17 | 15262 | 15486 | 4.3     | 8.4      |                                                                                                                                                         |
| gp18 | 15486 | 17405 | 5.4     | 71.1     | <i>Bacillus licheniformes</i> , <i>S. aureus</i> SAS1841                                                                                                |
| gp19 | 17417 | 18691 | 4.6     | 47.0     | Bacteriophage 37 ORF005; Bacteriophage EW ORF004; <i>L. monocytogenes</i> F2365 LMOF2365_0145                                                           |
| gp20 | 18708 | 18983 | 4.2     | 10.4     | <i>L. monocytogenes</i> EGDe, F6854; Bacteriophage A118 gp21 putative short tail fiber, Bacteriophage B054 gp27                                         |
| gp21 | 18989 | 19153 | 4.9     | 6.4      | Bacteriophage A118 gp22, <i>L. monocytogenes</i> F6854, EGDe; <i>L. innocua</i> lin1292, lin1706, Bacteriophage B054 gp28                               |
| gp22 | 19179 | 19634 | 9.6     | 17.3     | Bacteriophage PSA Gp17-1 <i>L. innocua</i> lin1705, lin1293, Bacteriophage B054 gp29                                                                    |
| gp23 | 19601 | 19996 | 5.9     | 14.9     | Bacteriophage PSA Gp18, <i>L. innocua</i> lin1704, lin1294, Bacteriophage B054 gp30                                                                     |
| gp24 | 20009 | 20257 | 9.7     | 9.4      | <i>L. innocua</i> lin1295 holin, Bacteriophage Tuc2009, Bacteriophage PSA holin, Bacteriophage TP901-1 + P335 Holin, Bacteriophage B054 gp32            |
| gp25 | 20257 | 21087 | 10.0    | 31.7     | <i>L. monocytogenes</i> EGDe endolysin L-alanoyl-D-glutamate peptidase, Bacteriophage A118 gp25; <i>L. monocytogenes</i> F6854                          |
| gp26 | 21099 | 21533 | 9.7     | 16.0     | <i>L. innocua</i> lin0129                                                                                                                               |
| gp27 | 21942 | 22445 | 4.5     | 19.8     |                                                                                                                                                         |
| gp28 | 22442 | 22834 | 8.9     | 15.2     |                                                                                                                                                         |
| gp29 | 22859 | 23017 | 10.2    | 5.8      |                                                                                                                                                         |
| gp30 | 23023 | 23175 | 10.2    | 6.1      |                                                                                                                                                         |

|       |       |       |      |      |                                                                                                                                                      |
|-------|-------|-------|------|------|------------------------------------------------------------------------------------------------------------------------------------------------------|
| gp31  | 23229 | 23463 | 11.0 | 6.3  |                                                                                                                                                      |
| gp32  | 23531 | 23764 | 5.1  | 9.3  | Bacteriophage PSA Gp22, <i>L. monocytogenes</i> H7858, EGDe lmo2271<br><i>L. innocua</i> lin2372                                                     |
| gp33  | 23761 | 23952 | 10.0 | 7.7  | Bacteriophage PSA Gp23, <i>L. monocytogenes</i> H7858,<br><i>L. innocua</i> lin1302                                                                  |
| gp34* | 25301 | 24147 | 9.8  | 44.6 | Bacteriophage PSA integrase, <i>L. innocua</i> lin2610                                                                                               |
| gp35* | 26050 | 25436 | 3.8  | 22.3 | <i>L. lactis</i> prophage pi3; <i>L. innocua</i> lin1471; Bacteriophage PSA Gp25                                                                     |
| gp36* | 26553 | 26101 | 5.3  | 17.9 | <i>L. innocua</i> lin2608, Bacteriophage PSA Gp26;<br><i>L. monocytogenes</i> F2365, EGDe lmo0113, F6854                                             |
| gp37* | 26890 | 26570 | 5.2  | 12.2 | Phage PSA Gp27 repressor protein, <i>L. innocua</i> lin2607,<br><i>Enterococcus faecalis</i> transcriptional regulator, Phage phi3396<br>repressor   |
| gp38  | 27157 | 27360 | 9.6  | 7.7  | Bacteriophage PSA Gp28, <i>L. innocua</i> lin2605                                                                                                    |
| gp39  | 27362 | 27604 | 9.5  | 9.6  | Bacteriophage PSA Gp29; <i>L. innocua</i> lin2604                                                                                                    |
| gp40  | 27607 | 27792 | 10.0 | 7.5  | Bacteriophage PSA Gp30                                                                                                                               |
| gp41  | 28027 | 28179 | 4.8  | 5.5  | Bacteriophage PSA Gp31                                                                                                                               |
| gp42  | 28316 | 29029 | 4.6  | 27.6 | <i>L. innocua</i> lin2602, lin2410, <i>Streptococcus pyogenes</i> phage SSI-1                                                                        |
| gp43  | 29040 | 29984 | 9.5  | 36.2 | <i>L. innocua</i> integrase lin2409, lin2601, lin1743, lin1254, lin0524,<br>Bacteriophage B054 gp64                                                  |
| gp44  | 29997 | 30677 | 9.7  | 27.0 | <i>L. innocua</i> lin2600 lin1255, lin1742, lin2408, Bacteriophage B054<br>gp65                                                                      |
| gp45  | 30674 | 31237 | 4.4  | 21.8 | <i>L. monocytogenes</i> H7858, Bacteriophage A118 gp51;<br><i>L. monocytogenes</i> EGDe lmo2315, Bacteriophage PSA Gp35                              |
| gp46  | 31458 | 31859 | 4.5  | 15.7 | Bacteriophage A118 gp54                                                                                                                              |
| gp47  | 31856 | 32065 | 4.0  | 8.1  | Bacteriophage A118 gp55, <i>L. monocytogenes</i> F6854, <i>L. innocua</i><br>lin0094                                                                 |
| gp48  | 32066 | 32395 | 4.0  | 12.5 |                                                                                                                                                      |
| gp49  | 32392 | 32664 | 4.5  | 10.3 |                                                                                                                                                      |
| gp50  | 32664 | 32843 | 9.2  | 6.8  | <i>L. innocua</i> lin2403                                                                                                                            |
| gp51  | 32840 | 33379 | 4.4  | 20.1 | <i>L. monocytogenes</i> F6854, EGDe lmo2312                                                                                                          |
| gp52  | 33379 | 33813 | 4.7  | 16.9 | Bacteriophage PSA Gp40                                                                                                                               |
| gp53  | 33810 | 34037 | 9.9  | 9.1  | Bacteriophage PSA Gp41, <i>L. innocua</i>                                                                                                            |
| gp54  | 34076 | 34249 | 9.6  | 6.6  | Bacteriophage PSA Gp44, <i>L. innocua</i> lin2592                                                                                                    |
| gp55  | 34246 | 34629 | 4.6  | 14.2 | Bacteriophage PSA Gp45                                                                                                                               |
| gp56  | 34631 | 35110 | 5.7  | 18.3 | <i>L. innocua</i> lin2591, Bacteriophage PSA Gp46; <i>L. monocytogenes</i><br>EGDe lmo2319, <i>L. innocua</i> lin2284, <i>L. monocytogenes</i> F2365 |
| gp57  | 35123 | 35815 | 5.1  | 25.9 | <i>S. pyogenes</i> SSI-1 COGO593, <i>S. suis</i> ATPase, <i>Lactococcus</i> phage<br>phi31, <i>L. innocua</i> lin2590, Bacteriophage PSA Gp47        |
| gp58  | 35993 | 37135 | 6.7  | 43.1 | <i>L. innocua</i> lin2589 putative helicase, Bacteriophage PSA Gp48,<br><i>Lactococcus</i> phage phi31                                               |
| gp59  | 37158 | 37640 | 5.8  | 18.3 | <i>L. innocua</i> lin2588, Bacteriophage PSA Gp49, Phage 858 orf38                                                                                   |
| gp60  | 37663 | 39936 | 5.6  | 87.2 | <i>L. innocua</i> lin2587, Bacteriophage PSA Gp50 primase, <i>L. casei</i> phage<br>A2                                                               |
| gp61  | 40225 | 40539 | 9.3  | 11.7 | <i>L. innocua</i> lin2586, Bacteriophage PSA Gp51; <i>S. pyogenes</i> SSI-1                                                                          |
| gp62  | 40542 | 41180 | 8.7  | 25.5 | <i>L. innocua</i> lin2585, Bacteriophage PSA Gp52                                                                                                    |
| gp63  | 41185 | 41610 | 9.7  | 16.8 | Bacteriophage PSA Gp53 transcriptional activator, <i>L. innocua</i> lin2583,<br><i>Geobacillus</i> virus E2 RinA transcription activator             |
| gp64  | 42047 | 42250 | 8.6  | 7.9  |                                                                                                                                                      |
| gp65  | 42295 | 42609 | 9.5  | 12.8 | <i>S. aureus</i> phage phiN315, Bacteriophage 77 ORF040,<br>Bacteriophage PSA Gp54; domain: restriction endonuclease                                 |

(n)... percent identity only to n-terminal 200aa

(c)... percent identity only to c-terminal 42aa

**TABLE 7.** General features and database matches of predicted proteins encoded by *Listeria innocua* Myovirus B054. Gene products annotated on the complementary strand are marked with an asterisk\*. gp Gene product, pI isoelectric point, MW molecular weight.

| ORF   | Start | Stop  | GP (pI) | MW (kDa) | Protein similarities in the database                                                                                                                                                        |
|-------|-------|-------|---------|----------|---------------------------------------------------------------------------------------------------------------------------------------------------------------------------------------------|
| gp1   | 26    | 910   | 9.7     | 33.5     | <i>Listeria innocua</i> lin1733, lin1266; <i>L. monocytogenes</i> F6854 small terminase subunit, <i>B. pumilus</i> ATCC7061 TerS                                                            |
| gp2   | 888   | 2348  | 5.7     | 56.1     | <i>L. innocua</i> lin1732; <i>Enterococcus faecalis</i> V583 large terminase subunit; Bacteriophage Aaphi23                                                                                 |
| gp3   | 2362  | 3747  | 5.2     | 52.3     | <i>L. innocua</i> lin1731; <i>E. faecalis</i> V583                                                                                                                                          |
| gp4   | 3740  | 5149  | 8.98    | 52.8     | <i>L. innocua</i> lin1730; <i>E. faecalis</i> V583 minor head protein                                                                                                                       |
| gp5   | 5146  | 5316  | 6.8     | 6.8      | <i>L. innocua</i> lin1729                                                                                                                                                                   |
| gp6   | 5365  | 6474  | 5.6     | 40.5     | <i>L. innocua</i> lin1728; <i>E. faecalis</i> V583 EF1461                                                                                                                                   |
| gp7   | 6474  | 6923  | 4.6     | 15.9     | <i>L. innocua</i> lin1727; <i>E. faecalis</i> V583 EF1462                                                                                                                                   |
| gp8   | 6944  | 7849  | 5.6     | 33.0     | <i>L. innocua</i> lin1726; <i>E. faecalis</i> V583 EF1463                                                                                                                                   |
| gp9   | 7872  | 8258  | 4.6     | 14.5     | <i>L. innocua</i> lin1725; <i>E. faecalis</i> V583 EF1464                                                                                                                                   |
| gp10  | 8270  | 8605  | 5.4     | 12.3     | <i>L. innocua</i> lin1724; <i>E. faecalis</i> V583 EF1465                                                                                                                                   |
| gp11  | 8605  | 9204  | 9.6     | 22.5     | <i>L. innocua</i> lin1723; <i>E. faecalis</i> V583 EF1466                                                                                                                                   |
| gp12  | 9204  | 9578  | 4.9     | 14.1     | <i>L. innocua</i> lin1722; <i>E. faecalis</i> V583 EF1467                                                                                                                                   |
| gp13  | 9568  | 10056 | 4.5     | 18.0     | <i>L. innocua</i> lin1721; <i>E. faecalis</i> V583 EF1468                                                                                                                                   |
| gp14  | 10061 | 11056 | 5.2     | 36.3     | <i>L. innocua</i> lin1720; <i>E. faecalis</i> V853 EF1469                                                                                                                                   |
| gp15  | 11073 | 11471 | 5.6     | 14.2     | <i>L. innocua</i> lin1719; <i>E. faecalis</i> V583 EF1470                                                                                                                                   |
| gp16  | 11524 | 11880 | 5.9     | 13.4     | <i>L. innocua</i> lin1718; <i>E. faecalis</i> V583 EF1471                                                                                                                                   |
| gp17  | 11843 | 12055 | 5.1     | 8.1      | <i>L. innocua</i> lin1717; <i>E. faecalis</i> V583 EF1472                                                                                                                                   |
| gp18  | 12057 | 16772 | 9.6     | 168.0    | <i>L. innocua</i> lin1716; <i>E. faecalis</i> V583 EF1473; Bacteriophage phig1e minor capsid protein, Bacteriophage B025 gp14                                                               |
| gp19  | 16778 | 17341 | 10.3    | 21.4     | <i>L. innocua</i> lin1715; <i>E. faecalis</i> V583 LysM domain protein                                                                                                                      |
| gp20  | 17341 | 17706 | 3.7     | 13.9     | <i>L. innocua</i> lin1714; <i>E. faecalis</i> V583 EF1475                                                                                                                                   |
| gp21  | 17706 | 18512 | 9       | 29.6     | <i>L. innocua</i> lin1713; <i>E. faecalis</i> V583 EF1476                                                                                                                                   |
| gp22  | 18513 | 18851 | 4.9     | 12.4     | <i>L. innocua</i> lin1712; <i>E. faecalis</i> V583 EF1477                                                                                                                                   |
| gp23  | 18848 | 19210 | 4.2     | 13.9     | <i>L. innocua</i> lin1711; <i>E. faecalis</i> V583 EF1478, Virus PhiCh1                                                                                                                     |
| gp24  | 19203 | 20354 | 4.6     | 41.5     | <i>L. innocua</i> lin1710; <i>E. faecalis</i> V583 EF1479; <i>Salmonella enterica</i> serovar typhi                                                                                         |
| gp25  | 20344 | 20985 | 5.3     | 23.1     | <i>L. innocua</i> lin1709; <i>E. faecalis</i> V583 EF1480                                                                                                                                   |
| gp26  | 21006 | 21734 | 5.3     | 26.5     | <i>L. innocua</i> lin1708, lin1290                                                                                                                                                          |
| gp27  | 21740 | 22081 | 4.1     | 13.1     | <i>L. innocua</i> lin1291, lin1707, Bacteriophage B025 gp20                                                                                                                                 |
| gp28  | 22113 | 22238 | 6.3     | 4.7      | <i>L. innocua</i> lin1292, lin1706; Bacteriophage A118 gp22, <i>L. monocytogenes</i> EGDe + F6854, Bacteriophage B025 gp21                                                                  |
| gp29  | 22268 | 22714 | 9.3     | 16.7     | <i>L. innocua</i> lin1705, lin1293; Bacteriophage PSA GP17-1, Bacteriophage B025 gp22                                                                                                       |
| gp30  | 22690 | 23136 | 5.8     | 17.0     | <i>L. innocua</i> lin1294, lin1704; Bacteriophage PSA GP18, Bacteriophage B025 gp23                                                                                                         |
| gp31  | 23155 | 23370 | 8.9     | 7.9      | <i>L. innocua</i> lin1703                                                                                                                                                                   |
| gp32  | 23381 | 23638 | 6.4     | 10.0     | <i>L. innocua</i> holin homolog lin1295; Bacteriophage Tuc2009 holin; <i>Lactococcus lactis</i> subsp. <i>cremoris</i> COG5546, Bacteriophage B025 gp24                                     |
| gp33  | 23638 | 24603 | 9.4     | 36.3     | Bacteriophage PSA Ply protein; <i>L. innocua</i> lin2374, lin2563 N-Acetylmuramoyl-L-alanine amidase (n-terminal) + L-alanoyl-D-glutamate peptidase (c-terminal); <i>Clostridium tetani</i> |
| gp34* | 24887 | 24666 | 6.8     | 8.6      | <i>L. innocua</i> lin1297 (gp28 A118 homolog)                                                                                                                                               |
| gp35* | 25118 | 24915 | 4.4     | 7.9      | <i>L. innocua</i> lin1298                                                                                                                                                                   |
| gp36* | 25506 | 25132 | 4.5     | 14.5     | <i>L. innocua</i> lin1299                                                                                                                                                                   |
| gp37* | 25912 | 25646 | 10.4    | 10.6     |                                                                                                                                                                                             |
| gp38* | 27463 | 26288 | 9.5     | 45.8     | <i>L. innocua</i> lin1765 integrase, <i>Streptococcus pyogenes</i> phage 315.5                                                                                                              |

|       |       |       |      |      |                                                                                                                                                      |
|-------|-------|-------|------|------|------------------------------------------------------------------------------------------------------------------------------------------------------|
| gp39* | 27952 | 27560 | 6.8  | 13.8 |                                                                                                                                                      |
| gp40* | 28419 | 28000 | 6.2  | 16.5 | <i>L. innocua</i> lin1233; <i>Bacillus anthracis</i> prophage lambda ba01 putative repressor protein                                                 |
| gp41* | 28864 | 28436 | 8    | 16.6 | <i>L. innocua</i> lin1234, <i>Bacillus cereus</i> ZK putative transcription regulator                                                                |
| gp42  | 29025 | 29210 | 9.3  | 7.3  | <i>L. innocua</i> lin1235 transcriptional regulator; <i>E. faecalis</i> V583, <i>L. monocytogenes</i> EGDe lmo2328                                   |
| gp43  | 29287 | 29811 | 5.3  | 20.0 | <i>L. innocua</i> lin1760, lin1236, Bacteriophage A118 gp43                                                                                          |
| gp44  | 29826 | 30119 | 5.9  | 11.7 | <i>B. pumilus</i> ATCC 7061 gp44                                                                                                                     |
| gp45  | 30124 | 30288 | 4.9  | 6.1  | <i>L. innocua</i> lin1238                                                                                                                            |
| gp46  | 30438 | 30728 | 5.3  | 11.2 | <i>L. innocua</i> lin1759, lin1239                                                                                                                   |
| gp47  | 30906 | 31133 | 9.3  | 9.1  | <i>L. innocua</i> lin1758                                                                                                                            |
| gp48  | 31151 | 31492 | 4.7  | 12.6 | <i>L. innocua</i> lin1757, lin1240                                                                                                                   |
| gp49  | 31479 | 33422 | 5    | 74.4 | <i>L. innocua</i> lin1756, lin1241; <i>Staphylococcus aureus</i> MSSA476                                                                             |
| gp50  | 33423 | 34208 | 5    | 29.7 | <i>L. innocua</i> lin1755, lin1242; <i>Streptococcus pyogenes</i> M1GAS                                                                              |
| gp51  | 34168 | 34905 | 8.6  | 28.1 | <i>L. innocua</i> lin1243, lin1754; <i>E. faecalis</i> V583 EF1433                                                                                   |
| gp52  | 34917 | 35834 | 5.7  | 35.3 | <i>L. innocua</i> lin1244, lin1753; Bacteriophage bIL286 replication protein; <i>E. faecalis</i> V583 DnaD domain protein                            |
| gp53  | 35758 | 36573 | 6.3  | 31.3 | <i>L. innocua</i> lin1752, lin1245; Bacteriophage 55 ORF016                                                                                          |
| gp54  | 36570 | 36764 | 5    | 7.6  |                                                                                                                                                      |
| gp55  | 36751 | 36957 | 10.5 | 8.2  | <i>L. innocua</i> lin1751, lin1246                                                                                                                   |
| gp56  | 36958 | 37167 | 6.8  | 8.3  | <i>L. innocua</i> lin1750, lin1247                                                                                                                   |
| gp57  | 37148 | 37585 | 9.8  | 16.7 | <i>L. innocua</i> lin1749, lin1248; Bacteriophage LLH ORF139; <i>Pediococcus pentosaceus</i> holliday junction resolvase                             |
| gp58  | 37606 | 38226 | 4.2  | 23.8 | <i>L. innocua</i> lin1748, lin1249; <i>E. faecalis</i> V583 EF2835                                                                                   |
| gp59  | 38267 | 38647 | 7.9  | 15.1 | <i>L. innocua</i> lin1250, lin1747                                                                                                                   |
| gp60  | 38607 | 38783 | 5    | 6.9  | <i>L. innocua</i> lin1251, lin1746                                                                                                                   |
| gp61  | 38795 | 39217 | 9.1  | 15.9 | <i>L. innocua</i> lin1252, lin1745; <i>S. pyogenes</i> phage 315.3; <i>E. faecalis</i> V583                                                          |
| gp62  | 39214 | 40575 | 9.5  | 53.5 | <i>L. innocua</i> lin1253, lin1744; <i>S. pyogenes</i> phage 315.3; <i>E. faecalis</i> V583                                                          |
| gp63  | 40588 | 40812 | 7.8  | 9.2  |                                                                                                                                                      |
| gp64  | 40812 | 41756 | 8.8  | 36.2 | <i>L. innocua</i> lin1254, lin1743, lin2409, lin2609; <i>Lactobacillus delbrueckii</i> integrase; <i>L. innocua</i> lin0524, Bacteriophage B025 gp43 |
| gp65  | 41769 | 42449 | 9.6  | 26.9 | <i>L. innocua</i> lin1255, lin1742, lin2600, lin2408; Bacteriophage EJ-1 transcriptional regulator, Bacteriophage B025 gp44                          |
| gp66  | 42446 | 42739 | 4.8  | 11.8 | <i>L. innocua</i> lin1256, lin2597                                                                                                                   |
| gp67  | 42757 | 42897 | 4.0  | 5.4  |                                                                                                                                                      |
| gp68  | 42884 | 43036 | 10.3 | 6.0  | <i>Bacillus clausii</i> KSM-K16 ABC1364                                                                                                              |
| gp69  | 43033 | 43284 | 5.4  | 10.1 | <i>L. innocua</i> lin1741; <i>E. faecalis</i> V583 EF0509                                                                                            |
| gp70  | 43296 | 43856 | 9.1  | 21.6 | <i>L. innocua</i> lin1740, lin1258                                                                                                                   |
| gp71  | 43937 | 44359 | 9.2  | 16.6 | <i>L. innocua</i> lin1739, lin1259; <i>L. monocytogenes</i> EGDe and F6854 transcriptional regulator; Bacteriophage A118 gp66                        |
| gp72  | 44372 | 45139 | 7.2  | 29.3 | <i>L. innocua</i> putative antirepressor lin1738, lin1260                                                                                            |
| gp73  | 45087 | 45257 | 10.6 | 7.0  |                                                                                                                                                      |
| gp74  | 45270 | 45386 | 9.7  | 4.6  |                                                                                                                                                      |
| gp75  | 45576 | 45710 | 8.4  | 5.5  |                                                                                                                                                      |
| gp76  | 45667 | 45960 | 9.4  | 11.6 |                                                                                                                                                      |
| gp77  | 45957 | 47294 | 4.9  | 51.1 | <i>L. innocua</i> lin1737, lin1262; <i>Ralstonia eutropha</i> COG0863                                                                                |
| gp78  | 47342 | 47539 | 10.1 | 7.8  | <i>L. innocua</i> lin1736, lin1263                                                                                                                   |
| gp79  | 47670 | 47900 | 5    | 9.1  | <i>L. innocua</i> lin1735, lin1264; <i>E. faecalis</i> V583 EF1453                                                                                   |
| gp80  | 47928 | 48152 | 4.2  | 8.7  | <i>L. innocua</i> lin1734, lin1265                                                                                                                   |

**TABLE 8.** General features and database matches of predicted proteins encoded by *Listeria monocytogenes* bacteriophage P35. gp Gene product, pI isoelectric point, MW molecular weight.

| ORF  | Start | Stop  | GP (pI) | MW (kDa) | Protein similarities in the database                                                                                                                              |
|------|-------|-------|---------|----------|-------------------------------------------------------------------------------------------------------------------------------------------------------------------|
| gp1  | 29    | 649   | 5.4     | 23.5     | Bacteriophage P40 gp1                                                                                                                                             |
| gp2  | 637   | 1959  | 5.3     | 50.7     | <i>Bacillus subtilis</i> phage SPP1 terminase large subunit, <i>Clostridium thermocellum</i> COG1783, Bacteriophage P40 gp2                                       |
| gp3  | 2008  | 3621  | 4.3     | 60.4     | <i>Enterococcus faecalis</i> V583 portal protein, Bacteriophage phiETA, <i>C. novyi</i> NT SPP1 gp6-like protein, Bacteriophage P40 gp3                           |
| gp4  | 3872  | 4780  | 8.1     | 34.7     | <i>E. faecalis</i> V583 minor head protein, <i>Staphylococcus</i> phage EW ORF012, Bacteriophage P40 gp4                                                          |
| gp5  | 4918  | 5499  | 4.6     | 21.6     | <i>E. faecalis</i> V583 scaffold protein, Bacteriophage P40 gp5                                                                                                   |
| gp6  | 5543  | 6451  | 4.9     | 32.9     | <i>Listeria monocytogenes</i> H7858 Gp34 main capsid, <i>L. innocua</i> lin2390, <i>C. thermocellum</i> DSM4150 phage major capsid protein, Bacteriophage P40 gp6 |
| gp7  | 6518  | 7054  | 4.1     | 20.4     | <i>E. faecalis</i> V583 protein EF0341, Bacteriophage P40 gp7                                                                                                     |
| gp8  | 7054  | 7407  | 5.6     | 13.1     | <i>E. faecalis</i> V583 protein EF0342, Bacteriophage P40 gp8                                                                                                     |
| gp9  | 7409  | 7834  | 9.5     | 16.1     | <i>E. faecalis</i> V583 protein EF0343, <i>C. perfringens</i> phage protein HK97 gp10 family, Bacteriophage P40 gp9                                               |
| gp10 | 7834  | 8298  | 4.5     | 18.2     | <i>E. faecalis</i> V583 protein EF0344, Bacteriophage P40 gp10                                                                                                    |
| gp11 | 8299  | 9279  | 4.3     | 35       | <i>E. faecalis</i> V583 protein EF0345, <i>C. acetobutylicum</i> CAC0057, Bacteriophage P40 gp11                                                                  |
| gp12 | 9363  | 9821  | 5.6     | 17.4     | Bacteriophage P40 gp12                                                                                                                                            |
| gp13 | 9875  | 10147 | 4.5     | 10.3     | <i>E. faecalis</i> V583 peptide methionine sulfoxid reductase, Bacteriophage P40 gp13                                                                             |
| gp14 | 10153 | 12039 | 10      | 67.9     | <i>E. faecalis</i> V583 tail protein, <i>C. thermocellum</i> tail protein, Bacteriophage P40 gp14                                                                 |
| gp15 | 12036 | 13295 | 4.1     | 46.5     | Bacteriophage fOg44 hypothetical protein, Bacteriophage P40 gp15                                                                                                  |
| gp16 | 13288 | 14451 | 8.7     | 43.7     | <i>Leuconostoc mesenteroides</i> Lmes02000557, Bacteriophage fOg44 hypothetical protein, Bacteriophage P40 gp16                                                   |
| gp17 | 14459 | 15295 | 9.4     | 30.6     | <i>Leuconostoc mesenteroides</i> Lmes02000556, Bacteriophage fOg44 hypothetical protein, Bacteriophage P40 gp17                                                   |
| gp18 | 15427 | 15876 | 5.9     | 16.6     | <i>Streptococcus</i> phage Cp-1 holin protein, <i>C. thermocellum</i> holin, Bacteriophage P40 gp18                                                               |
| gp19 | 16299 | 16544 | 7.1     | 9.5      | Bacteriophage P40 gp20                                                                                                                                            |
| gp20 | 16660 | 16905 | 8.6     | 9.7      |                                                                                                                                                                   |
| gp21 | 16905 | 17117 | 4.6     | 8.5      |                                                                                                                                                                   |
| gp22 | 17119 | 17448 | 9.9     | 12.3     |                                                                                                                                                                   |
| gp23 | 17448 | 18221 | 4.5     | 28.3     |                                                                                                                                                                   |
| gp24 | 18218 | 18460 | 6.1     | 9.2      |                                                                                                                                                                   |
| gp25 | 18444 | 19067 | 8.5     | 24.1     | Vibriophage VpV262 HNH DNase, Mimivirus endonuclease                                                                                                              |
| gp26 | 19103 | 19261 | 10.2    | 6        |                                                                                                                                                                   |
| gp27 | 19272 | 19433 | 9.2     | 6.3      |                                                                                                                                                                   |
| gp28 | 19450 | 20325 | 10.2    | 33.1     | <i>L. innocua</i> phage lysin, Bacteriophage A500 L-alanoyl-D-glutamate peptidase                                                                                 |
| gp29 | 20439 | 20834 | 4.8     | 15.8     |                                                                                                                                                                   |
| gp30 | 20884 | 21456 | 6       | 22.3     | Bacteriophage P40 gp28                                                                                                                                            |
| gp31 | 21497 | 22243 | 5.1     | 28.9     | <i>Lactobacillus johnsonii</i> prophage Lj965 protein Ljo0298, Bacteriophage P40 gp29                                                                             |
| gp32 | 22263 | 22958 | 4.9     | 27       | Bacteriophage P40 gp30                                                                                                                                            |
| gp33 | 23285 | 25192 | 6.9     | 73.3     | <i>C. thermocellum</i> DNA polymerase elongation subunit, <i>C. botulinum</i> DNA polymerase, Bacteriophage P40 gp31                                              |
| gp34 | 25205 | 27109 | 5.5     | 72.5     | <i>C. thermocellum</i> ATPase, <i>Streptococcus thermophilus</i> DNA primase,                                                                                     |

|      |       |       |      |      |                                                                               |
|------|-------|-------|------|------|-------------------------------------------------------------------------------|
|      |       |       |      |      | Bacteriophage P40 gp32                                                        |
| gp35 | 27102 | 27341 | 9.5  | 9    |                                                                               |
| gp36 | 27437 | 27652 | 5    | 8.1  |                                                                               |
| gp37 | 27649 | 28203 | 5.4  | 21.5 |                                                                               |
| gp38 | 28203 | 28787 | 9.1  | 22.6 | <i>Listeria innocua</i> lin2585, Cyanophage Syn5 gp31, Bacteriophage P40 gp35 |
| gp39 | 28784 | 29215 | 7.8  | 16.9 |                                                                               |
| gp40 | 29290 | 29490 | 5.2  | 7.6  |                                                                               |
| gp41 | 29487 | 29957 | 7.6  | 17.6 | (LP65 orf143 HNH homing endonuclease), Bacteriophage P40 gp41                 |
| gp42 | 29957 | 30172 | 5    | 8.2  |                                                                               |
| gp43 | 30183 | 30644 | 4.8  | 17.7 |                                                                               |
| gp44 | 30647 | 31012 | 6.2  | 14.4 |                                                                               |
| gp45 | 31005 | 31319 | 4.7  | 11.8 | <i>Staphylococcus aureus</i> Phage K ORF17, <i>Enterococcus hirae</i> ArpR    |
| gp46 | 31316 | 31624 | 4.6  | 11.5 |                                                                               |
| gp47 | 31617 | 31799 | 4    | 7.1  |                                                                               |
| gp48 | 31908 | 32012 | 7.6  | 3.8  |                                                                               |
| gp49 | 32009 | 32320 | 6.2  | 11.9 |                                                                               |
| gp50 | 32298 | 32465 | 10.2 | 6.7  |                                                                               |
| gp51 | 32449 | 33357 | 6.9  | 34.8 |                                                                               |
| gp52 | 33357 | 33548 | 8.6  | 7.5  |                                                                               |
| gp53 | 33550 | 34179 | 5.2  | 25   |                                                                               |
| gp54 | 34270 | 34674 | 5.5  | 15.5 |                                                                               |
| gp55 | 34677 | 35090 | 9.5  | 16.2 |                                                                               |
| gp56 | 35063 | 35326 | 4.7  | 10.3 |                                                                               |

\* identity to only c-terminal 73 amino acids of LP65 orf143

**TABLE 9.** General features and database matches of predicted proteins encoded by *Listeria monocytogenes* bacteriophage P40. gp Gene product, pI isoelectric point, MW molecular weight.

| ORF   | Start | Stop  | GP (pI) | MW (kDa) | Protein similarities in the database                                                                                                                                                                            |
|-------|-------|-------|---------|----------|-----------------------------------------------------------------------------------------------------------------------------------------------------------------------------------------------------------------|
| gp 1  | 62    | 781   | 4.7     | 28.9     | Bacteriophage P35 gp1                                                                                                                                                                                           |
| gp 2  | 781   | 2073  | 6.0     | 49.7     | <i>Clostridium thermocellum</i> ATCC 27405 phage terminase large subunit, Bacteriophage P35 gp2                                                                                                                 |
| gp 3  | 2322  | 3914  | 4.4     | 60.3     | <i>Enterococcus faecalis</i> V583 portal protein, <i>C. novyi</i> NT portal protein, Bacteriophage P35 gp3                                                                                                      |
| gp 4  | 3930  | 4841  | 8.7     | 34.7     | <i>E. faecalis</i> V583 and <i>C. perfringens</i> JGS1495 minor head protein, Bacteriophage P35 gp4                                                                                                             |
| gp 5  | 4969  | 5556  | 4.6     | 22.0     | <i>C. novyi</i> NT scaffold protein, Bacteriophage P35 gp5                                                                                                                                                      |
| gp 6  | 5582  | 6475  | 5.0     | 32.3     | <i>C. thermocellum</i> ATCC 27405 Lj928 prophage protein, <i>Listeria monocytogenes</i> str. 4b H7858 main capsid protein Gp34, Bacteriophage P35 gp6                                                           |
| gp 7  | 6543  | 7079  | 4.3     | 20.4     | <i>E. faecalis</i> V583 protein EF0341, Bacteriophage P35 gp7                                                                                                                                                   |
| gp 8  | 7072  | 7419  | 5.5     | 13.3     | <i>E. faecalis</i> V583 protein EF0342, Bacteriophage P35 gp8                                                                                                                                                   |
| gp 9  | 7394  | 7858  | 8.6     | 17.6     | <i>E. faecalis</i> V583 conserved hypothetical protein TIGR01725, <i>C. perfringens</i> JGS1495 HK97 gp10 family protein, Bacteriophage P35 gp9                                                                 |
| gp 10 | 7855  | 8322  | 4.9     | 18.3     | Bacteriophage P35 gp10                                                                                                                                                                                          |
| gp 11 | 8323  | 9285  | 4.5     | 34.7     | <i>E. faecalis</i> V583 protein EF0345, <i>C. acetobutylicum</i> ATCC 824 hypothetical protein CAC0057, Bacteriophage P35 gp11                                                                                  |
| gp 12 | 9371  | 9808  | 5.2     | 16.1     | Bacteriophage P35 gp12                                                                                                                                                                                          |
| gp 13 | 9862  | 10125 | 4.7     | 10.2     | <i>E. faecalis</i> V583 peptide methionine sulfoxide reductase, Bacteriophage P35 gp13                                                                                                                          |
| gp 14 | 10160 | 12046 | 9.6     | 67.7     | <i>Streptococcus pneumoniae</i> SP3-BS71 unknown phage protein, <i>E. faecalis</i> V583 tail protein, <i>L. casei</i> BL23 tail tape measure protein, Bacteriophage P35 gp14                                    |
| gp 15 | 12046 | 13332 | 4.3     | 47.5     | <i>Oenococcus oeni</i> bacteriophage fOg44 hypothetical protein*, Bacteriophage P35 gp15                                                                                                                        |
| gp 16 | 13325 | 14470 | 7.2     | 43.5     | <i>Oenococcus oeni</i> bacteriophage fOg44 hypothetical protein, Bacteriophage P35 gp16                                                                                                                         |
| gp 17 | 14486 | 15325 | 8.9     | 30.2     | <i>Oenococcus oeni</i> bacteriophage fOg44 hypothetical protein*, Bacteriophage P35 gp17                                                                                                                        |
| gp 18 | 15487 | 15942 | 7.0     | 16.8     | <i>Streptococcus</i> phage Cp-1 holin protein, Bacteriophage P35 gp18                                                                                                                                           |
| gp 19 | 15947 | 16096 | 9.9     | 5.7      |                                                                                                                                                                                                                 |
| gp 20 | 16305 | 16589 | 4.9     | 11.1     | Bacteriophage P35 gp19                                                                                                                                                                                          |
| gp 21 | 16780 | 16968 | 8.2     | 7.7      |                                                                                                                                                                                                                 |
| gp 22 | 16937 | 17314 | 9.9     | 14.4     |                                                                                                                                                                                                                 |
| gp 23 | 17317 | 17457 | 6.2     | 5.3      |                                                                                                                                                                                                                 |
| gp 24 | 17764 | 17916 | 10.1    | 5.9      |                                                                                                                                                                                                                 |
| gp 25 | 17927 | 18082 | 9.6     | 6.0      |                                                                                                                                                                                                                 |
| gp 26 | 18076 | 19110 | 9.7     | 38.4     | <i>Bacillus licheniformis</i> ATCC 14580 glycoside hydrolase family 25, <i>B. thuringiensis</i> serovar <i>israelensis</i> ATCC 35646 N-acetylmuramoyl-L-alanine amidase, <i>B. cereus</i> NVH0597-99 endolysin |
| gp 27 | 19265 | 19627 | 9.3     | 14.3     |                                                                                                                                                                                                                 |
| gp 28 | 19633 | 20256 | 6.6     | 24.2     | <i>C. thermocellum</i> ATCC 27405 beta-lactamase-like protein, Bacteriophage P35 gp30                                                                                                                           |
| gp 29 | 20268 | 21017 | 5.5     | 28.9     | <i>Lactobacillus johnsonii</i> prophage Lj965 protein Ljo0298, Bacteriophage P35 gp31                                                                                                                           |
| gp 30 | 21038 | 21742 | 5.1     | 36.8     | Bacteriophage P35 gp32                                                                                                                                                                                          |
| gp 31 | 21827 | 23833 | 6.5     | 76.9     | <i>Fusobacterium nucleatum</i> subsp. <i>polymorphum</i> ATCC 10953 possible DNA-directed DNA polymerase II, <i>C. thermocellum</i> ATCC 27405 phage                                                            |

|       |       |       |      |      |                                                                                                                                                                |
|-------|-------|-------|------|------|----------------------------------------------------------------------------------------------------------------------------------------------------------------|
|       |       |       |      |      | DNA polymerase, Bacteriophage P35 gp33                                                                                                                         |
| gp 32 | 23846 | 25753 | 6.2  | 72.8 | <i>Fusobacterium nucleatum</i> subsp. <i>polymorphum</i> ATCC 10953 ATP-binding protein, <i>C. thermocellum</i> ATCC 27405 DNA primase, Bacteriophage P35 gp34 |
| gp 33 | 25754 | 25999 | 6.8  | 9.6  |                                                                                                                                                                |
| gp 34 | 25983 | 26411 | 4.9  | 16.6 |                                                                                                                                                                |
| gp 35 | 26526 | 27065 | 7.9  | 20.9 | Bacteriophage P35 gp37                                                                                                                                         |
| gp 36 | 27062 | 27247 | 8.3  | 7.4  |                                                                                                                                                                |
| gp 37 | 27244 | 27447 | 9.2  | 8.7  |                                                                                                                                                                |
| gp 38 | 27444 | 28220 | 5.7  | 29.4 | <i>Listeria</i> bacteriophage P100 gp124**, Cyanophage Syn5 gp31                                                                                               |
| gp 39 | 28233 | 28673 | 5.1  | 17.0 |                                                                                                                                                                |
| gp 40 | 28663 | 28857 | 4.6  | 7.3  |                                                                                                                                                                |
| gp 41 | 28854 | 29384 | 6.0  | 20.5 | LP65 orf143 HNH homing endonuclease***, Bacteriophage P35 gp41                                                                                                 |
| gp 42 | 29374 | 29925 | 5.5  | 21.8 | <i>L. monocytogenes</i> str. 4b H7858 protein gp51, A118 gp51                                                                                                  |
| gp 43 | 29926 | 30135 | 6.1  | 8.0  |                                                                                                                                                                |
| gp 44 | 30136 | 30540 | 5.8  | 15.6 |                                                                                                                                                                |
| gp 45 | 30537 | 30707 | 4.5  | 6.8  |                                                                                                                                                                |
| gp 46 | 30685 | 30843 | 9.6  | 6.3  |                                                                                                                                                                |
| gp 47 | 30869 | 31150 | 4.7  | 11.3 |                                                                                                                                                                |
| gp 48 | 31175 | 31447 | 5.1  | 10.4 |                                                                                                                                                                |
| gp 49 | 31611 | 31886 | 4.4  | 10.9 |                                                                                                                                                                |
| gp 50 | 31893 | 32024 | 9.8  | 5.4  |                                                                                                                                                                |
| gp 51 | 32027 | 32227 | 6.1  | 7.4  |                                                                                                                                                                |
| gp 52 | 32227 | 32376 | 10.0 | 5.8  |                                                                                                                                                                |
| gp 53 | 32373 | 32588 | 8.7  | 8.3  |                                                                                                                                                                |
| gp 54 | 32578 | 32829 | 4.4  | 9.7  |                                                                                                                                                                |
| gp 55 | 32819 | 33103 | 5.0  | 11.2 |                                                                                                                                                                |
| gp 56 | 33075 | 33371 | 5.8  | 11.6 |                                                                                                                                                                |
| gp 57 | 33368 | 33652 | 7.0  | 10.9 |                                                                                                                                                                |
| gp 58 | 33770 | 34501 | 9.5  | 29.6 |                                                                                                                                                                |
| gp 59 | 34520 | 34702 | 4.7  | 7.2  |                                                                                                                                                                |
| gp 60 | 34702 | 34896 | 6.8  | 9.3  |                                                                                                                                                                |
| gp 61 | 34889 | 35059 | 4.5  | 6.7  |                                                                                                                                                                |
| gp 62 | 35366 | 35524 | 10.0 | 6.1  |                                                                                                                                                                |

\* identities only in the first 152 n-terminal amino acids of P40 gp 17

\*\* identities only in a 62 c-terminal amino acids region of P40 gp 38

\*\*\* identities only in a 42 c-terminal amino acids region of P40 gp 41
